# Supplementary material
Source: PubMed Central journal article supplement (PMC4821714)
Supplement: NIHMS762144-supplement-1.pdf [file NIHMS762144-supplement-1.pdf]

## Movie legends

**Movie S1.** Rac1 activation during fMLP stimulation of macrophages. Time lapse of FRET/mCer ratio and corresponding DIC image. Duration of original sequence: 15 min. Magnification 60X, 2X2 binning. Frame interval: 10 s. Replay: 5 frames/s. Scale bar = 5  $\mu\text{m}$ . \* = start of fMLP stimulation.

**Movie S2.** Rac2 activation during fMLP stimulation of macrophages. Time lapse of FRET/mCer ratio and corresponding DIC image. Duration of original sequence: 15 min. Magnification 60X, 2X2 binning. Frame interval: 10 s. Replay: 5 frames/s. Scale bar = 5  $\mu\text{m}$ . \* = start of fMLP stimulation.

**Movie S3.** Rac1 activation during serum-induced random protrusions in macrophages. Time lapse of FRET/mCer ratio and corresponding DIC image. Duration of original sequence: 10 min. Magnification 60X, 2X2 binning. Frame interval: 10 s. Replay: 5 frames/s. Scale bar = 10  $\mu\text{m}$ .

**Movie S4.** Rac2 activation during serum-induced random protrusions in macrophages. Time lapse of FRET/mCer ratio and corresponding DIC image. Duration of original sequence: 10 min. Magnification 60X, 2X2 binning. Frame interval: 10 s. Replay: 5 frames/s. Scale bar = 10  $\mu\text{m}$ .

**Movie S5.** Cdc42 activation during serum-induced random protrusions in macrophages. Time lapse of FRET/mCer ratio and corresponding DIC image. Duration of original sequence: 10 min. Magnification 60X, 2X2 binning. Frame interval: 10 s. Replay: 5 frames/s. Scale bar = 10  $\mu\text{m}$ .

**Movie S6.** Serum-induced random protrusions in Rac2-reduced macrophages. Time lapse of DIC images of control (shCtrl2, left) and shRac2 (right). Duration of original sequence: 10 min. Magnification 60X, 2X2 binning. Frame interval: 10 s. Replay: 5 frames/s. Scale bar = 10  $\mu\text{m}$ .

**Movie S7.** Serum-induced random protrusions in Rac1-reduced macrophages. Time lapse of DIC images of control (shCtrl1, left) and shRac1 (right). Duration of original sequence: 10 min. Magnification 60X, 2X2 binning. Frame interval: 10 s. Replay: 5 frames/s. Scale bar = 10  $\mu\text{m}$ .
